# Supplementary material for: Metabolite Sequestration Enables Rapid Recovery from Fatty Acid Depletion in Escherichia coli
Source: PubMed Central journal article supplement (PMC7078478; doi:10.1128/mbio.03112-19), 2020-03-17

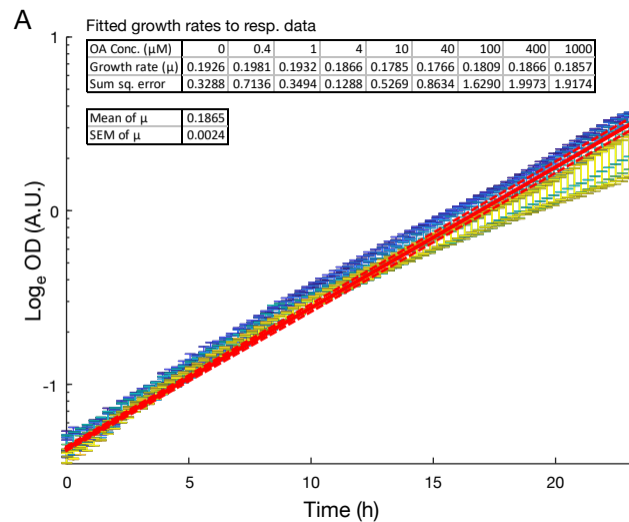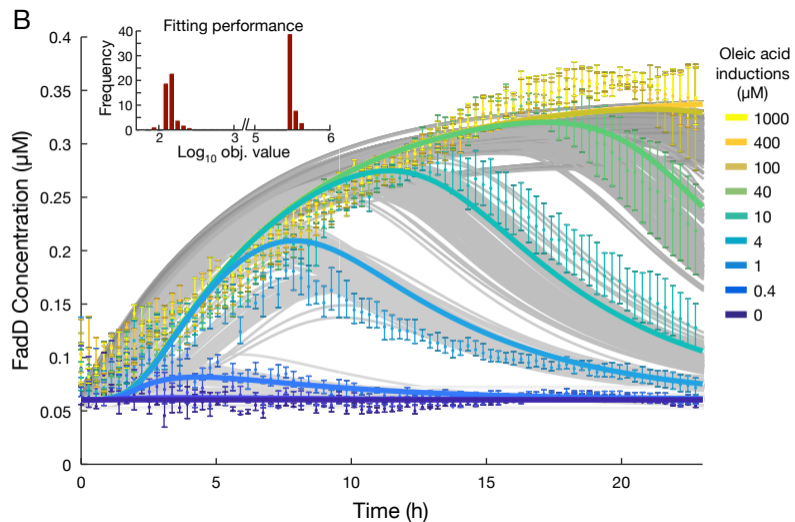

Supplement: mBio.03112-19-sf001.pdf [file mBio.03112-19-sf001.pdf]
